# Supplementary material for: Piezoelectricity and related properties in orthorhombic cadmium diiodate
Source: Royal Society of Chemistry journal article supplement (doi:10.1039/d2tc00769j), 2022-01-01
Supplement: d2tc00769j1.pdf [file d2tc00769j1.pdf]

# Supporting information

## Piezoelectricity and Related Properties in Orthorhombic Cadmium Diiodate

H. Azeroual,<sup>†</sup> J.L. Bantignies,<sup>‡</sup> L. Alvarez,<sup>‡</sup> D. Maurin,<sup>‡</sup> D. Granier,<sup>†</sup> J. Haines,<sup>†</sup> O.  
Cambon,<sup>†</sup> and P. Hermet<sup>\*,†</sup>

*ICGM, Univ. Montpellier, CNRS, ENSCM, Montpellier, France, and Laboratoire Charles  
Coulomb (L2C), CNRS, University of Montpellier, France*

E-mail: Patrick.Hermet@umontpellier.fr

---

\*To whom correspondence should be addressed

<sup>†</sup>ICGM, Univ. Montpellier, CNRS, ENSCM, Montpellier, France

<sup>‡</sup>Laboratoire Charles Coulomb (L2C), CNRS, University of Montpellier, France

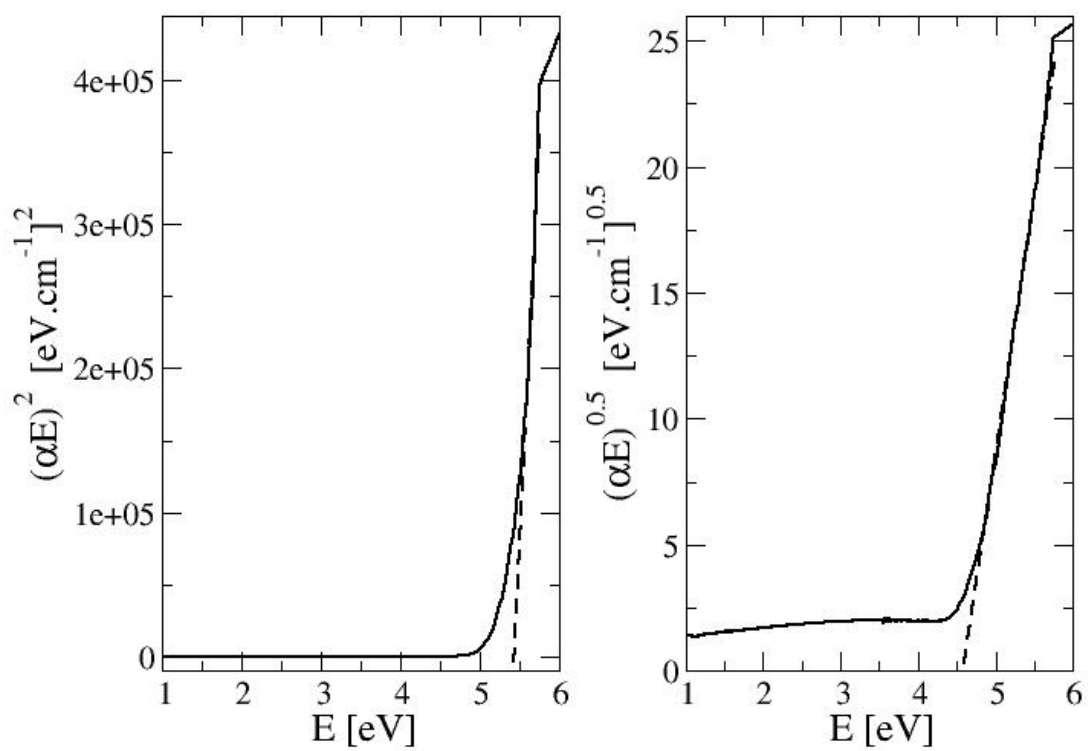

Figure S1.  $(\alpha E)^2$  and  $(\alpha E)^{\frac{1}{2}}$  Tauc plots of CDI obtained from UV-vis spectroscopy.

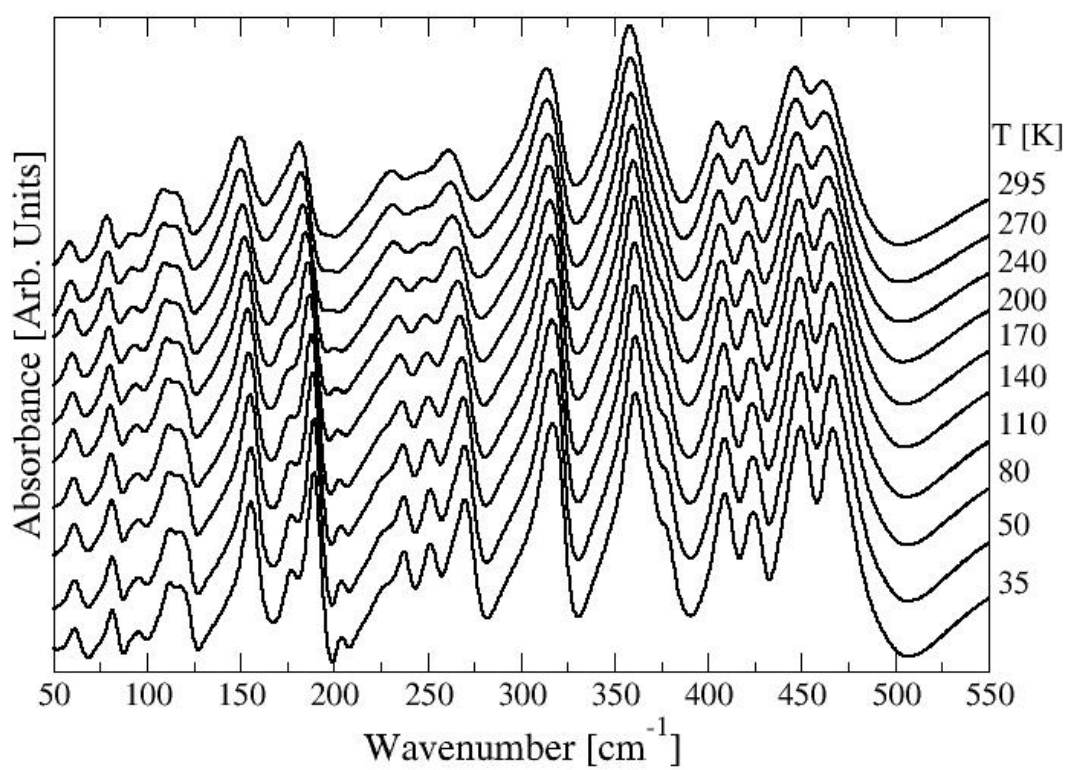

Figure S2. Experimental far-infrared (50–550  $\text{cm}^{-1}$ ) signatures of CDI between 35 and 295 K.

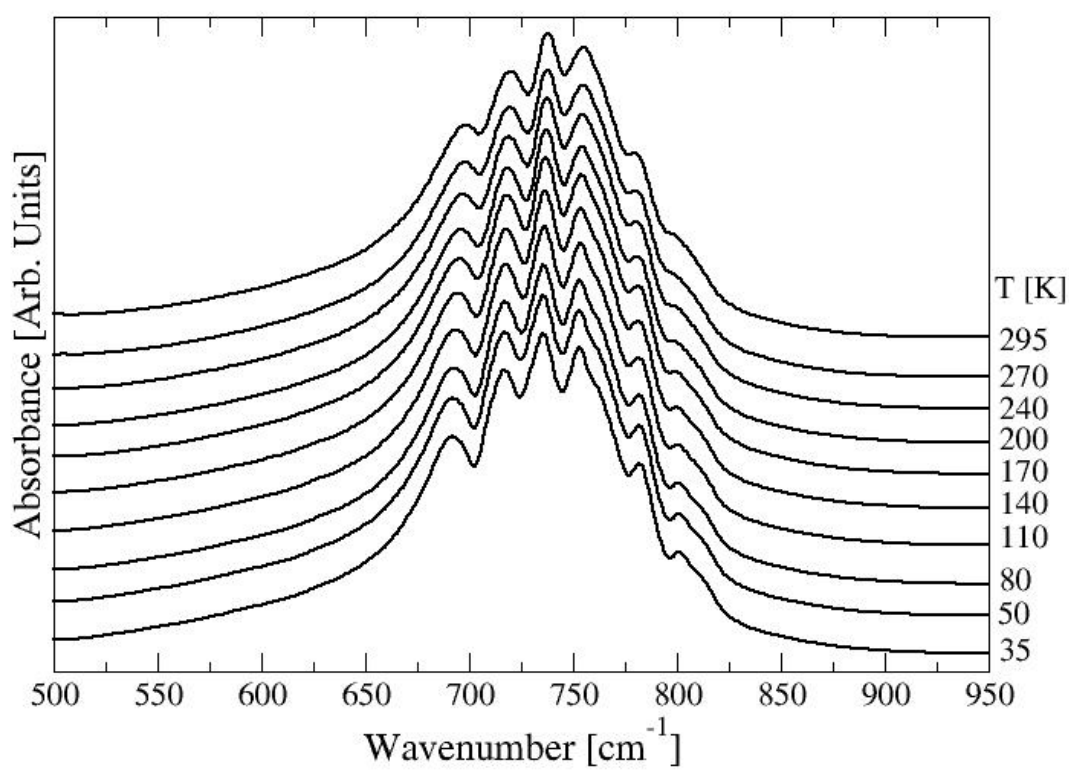

Figure S3. Experimental mid-infrared (500–950  $\text{cm}^{-1}$ ) signatures of CDI between 35 and 295 K.

Tables S1. Refinement details of CDI single crystal from x-ray diffraction.

|                                |              |                                                    |         |
|--------------------------------|--------------|----------------------------------------------------|---------|
| Formula mass (amu)             | 462.231      | $2\theta_{max}$ ( $^{\circ}$ )                     | 93.71   |
| Color and habit                | colorless    | $\rho_{calc}$ ( $\text{g}\cdot\text{cm}^{-3}$ )    | 5.36    |
| Crystal system                 | Orthorhombic | $\lambda$ ( $\text{\AA}$ )                         | 0.71073 |
| Space group                    | $P2_12_12_1$ | $\mu$ ( $\text{Mo K}\alpha$ ) ( $\text{cm}^{-1}$ ) | 150.13  |
| $a$ ( $\text{\AA}$ )           | 5.856(10)    | Reflections collected                              | 150137  |
| $b$ ( $\text{\AA}$ )           | 17.480(3)    | Independent reflection                             | 4614    |
| $c$ ( $\text{\AA}$ )           | 5.588(10)    | Restraints/Parameters                              | 0/82    |
| $\Omega$ ( $\text{\AA}^3$ )    | 572.00(17)   | R(F) for $F_0^2 > 2\sigma(F_0^2)$                  | 0.3095  |
| Z                              | 4            | Rw( $F_0^2$ )                                      | 0.0176  |
| T ( $^{\circ}\text{C}$ )       | 23           | Flack factor                                       | 0.125   |
| $2\theta_{min}$ ( $^{\circ}$ ) | 4.56         | R1                                                 | 0.0175  |

| atom | $x/a$      | $y/b$       | $z/c$       |
|------|------------|-------------|-------------|
| I    | 0.63731(2) | 0.42249(2)  | 0.52928(3)  |
| I    | 0.21388(2) | 0.29137(2)  | 0.75431(3)  |
| Cd   | 0.17159(3) | 0.40658(2)  | 0.20690(3)  |
| O    | 0.5053(3)  | 0.33882(12) | 0.3893(4)   |
| O    | 0.0211(3)  | 0.33677(13) | 0.5412(4)   |
| O    | 0.0299(4)  | 0.29231(13) | 1.0153(4)   |
| O    | 0.8161(3)  | 0.45290(13) | 0.2793(4)   |
| O    | 0.3712(4)  | 0.37540(12) | 0.8613(4)   |
| O    | 0.3955(3)  | 0.48426(11) | 0.48426(11) |

Table S2. Calculated zone-center transverse optical (TO) frequencies (in  $\text{cm}^{-1}$ ) of CDI using the PBEvdW model with their symmetries.

| Sym.           | Freq. |
|----------------|-------|----------------|-------|----------------|-------|----------------|-------|----------------|-------|
| A              | 37    | B <sub>1</sub> | 130   | B <sub>3</sub> | 222   | B <sub>3</sub> | 408   | B <sub>1</sub> | 674   |
| B <sub>2</sub> | 39    | A              | 135   | A              | 233   | A              | 416   | A              | 689   |
| B <sub>2</sub> | 41    | B <sub>1</sub> | 142   | B <sub>3</sub> | 237   | B <sub>1</sub> | 420   | B <sub>1</sub> | 691   |
| A              | 42    | B <sub>3</sub> | 146   | B <sub>1</sub> | 252   | B <sub>2</sub> | 427   | B <sub>3</sub> | 698   |
| B <sub>1</sub> | 59    | A              | 148   | B <sub>2</sub> | 254   | A              | 430   | A              | 701   |
| B <sub>3</sub> | 63    | B <sub>3</sub> | 152   | A              | 256   | B <sub>3</sub> | 431   | B <sub>2</sub> | 707   |
| B <sub>3</sub> | 65    | A              | 152   | B <sub>3</sub> | 262   | B <sub>1</sub> | 436   | B <sub>3</sub> | 711   |
| A              | 68    | B <sub>2</sub> | 153   | B <sub>1</sub> | 263   | B <sub>2</sub> | 443   | B <sub>2</sub> | 721   |
| B <sub>1</sub> | 77    | B <sub>1</sub> | 154   | B <sub>2</sub> | 265   | B <sub>3</sub> | 450   | B <sub>1</sub> | 724   |
| A              | 78    | B <sub>2</sub> | 163   | B <sub>2</sub> | 283   | B <sub>2</sub> | 560   |                |       |
| B <sub>3</sub> | 79    | B <sub>1</sub> | 170   | B <sub>1</sub> | 290   | A              | 577   |                |       |
| B <sub>1</sub> | 84    | B <sub>3</sub> | 171   | A              | 292   | B <sub>1</sub> | 593   |                |       |
| B <sub>1</sub> | 90    | B <sub>2</sub> | 178   | B <sub>3</sub> | 298   | B <sub>3</sub> | 598   |                |       |
| B <sub>2</sub> | 93    | A              | 179   | A              | 325   | B <sub>1</sub> | 619   |                |       |
| B <sub>3</sub> | 95    | B <sub>1</sub> | 185   | B <sub>3</sub> | 327   | B <sub>3</sub> | 622   |                |       |
| A              | 98    | B <sub>1</sub> | 185   | A              | 332   | A              | 623   |                |       |
| B <sub>3</sub> | 104   | B <sub>2</sub> | 186   | B <sub>2</sub> | 333   | B <sub>2</sub> | 626   |                |       |
| A              | 107   | B <sub>2</sub> | 189   | B <sub>1</sub> | 337   | B <sub>2</sub> | 630   |                |       |
| B <sub>1</sub> | 109   | B <sub>3</sub> | 193   | B <sub>3</sub> | 344   | A              | 640   |                |       |
| B <sub>2</sub> | 112   | B <sub>3</sub> | 200   | B <sub>1</sub> | 351   | B <sub>2</sub> | 641   |                |       |
| B <sub>2</sub> | 115   | A              | 201   | B <sub>2</sub> | 355   | B <sub>1</sub> | 643   |                |       |
| B <sub>3</sub> | 116   | A              | 218   | A              | 383   | B <sub>3</sub> | 649   |                |       |
| A              | 119   | B <sub>2</sub> | 220   | B <sub>1</sub> | 384   | A              | 665   |                |       |
| B <sub>2</sub> | 125   | B <sub>1</sub> | 221   | B <sub>2</sub> | 401   | B <sub>3</sub> | 666   |                |       |
